# Supplementary material
Source: ML conference proceedings conference paper supplement (https://proceedings.neurips.cc/paper_files/paper/2015/hash/9a3d458322d70046f63dfd8b0153ece4-Abstract.html)
Supplement: Supplementary file [file 9a3d458322d70046f63dfd8b0153ece4-Supplemental.zip]

---

# Supervised Learning for Dynamical System Learning (Supplementary)

---

## A Spectral and HSE Dynamical System Learning as Regression

In this section we provide examples of mapping some of the successful dynamical system learning algorithms to our framework.

### A.1 HMM

In this section we show that we can use instrumental regression framework to reproduce the spectral learning algorithm for learning HMM [1]. We consider 1-observable models but the argument applies to  $k$ -observable models. In this case we use  $\psi_t = e_{o_t}$  and  $\xi_t = e_{o_{t:t+1}} = e_{o_t} \otimes_k e_{o_{t+1}}$ , where  $\otimes_k$  denotes the kronecker product. Let  $P_{i,j} \equiv \mathbb{E}[e_{o_i} \otimes e_{o_j}]$  be the joint probability table of observations  $i$  and  $j$  and let  $\hat{P}_{i,j}$  be its estimate from the data. We start with the (very restrictive) case where  $P_{1,2}$  is invertible. Given samples of  $h_2 = e_{o_1}$ ,  $\psi_2 = e_{o_2}$  and  $\xi_2 = e_{o_{2:3}}$ , in S1 regression we apply linear regression to learn two matrices  $\hat{W}_{2,1}$  and  $\hat{W}_{2:3,1}$  such that:

$$\hat{\mathbb{E}}[\psi_2|h_2] = \hat{\Sigma}_{o_2 o_1} \hat{\Sigma}_{o_1}^{-1} h_2 = \hat{P}_{2,1} \hat{P}_{1,1}^{-1} h_2 \equiv \hat{W}_{2,1} h_2 \quad (\text{A.1})$$

$$\hat{\mathbb{E}}[\xi_2|h_2] = \hat{\Sigma}_{o_{2:3} o_1} \hat{\Sigma}_{o_1}^{-1} h_2 = \hat{P}_{2:3,1} \hat{P}_{1,1}^{-1} h_2 \equiv \hat{W}_{2:3,1} h_2, \quad (\text{A.2})$$

where  $P_{2:3,1} \equiv \mathbb{E}[e_{o_{2:3}} \otimes e_{o_1}]$

In S2 regression, we learn the matrix  $\hat{W}$  that gives the least squares solution to the system of equations

$$\hat{\mathbb{E}}[\xi_2|h_2] \equiv \hat{W}_{2:3,1} e_{o_1} = \hat{W} (\hat{W}_{2,1} e_{o_1}) \equiv \hat{W} \hat{\mathbb{E}}[\psi_2|h_2] \quad , \text{ for given samples of } h_2$$

which gives

$$\begin{aligned} \hat{W} &= \hat{W}_{2:3,1} \hat{\mathbb{E}}[e_{o_1} e_{o_1}^\top] \hat{W}_{2,1}^\top \left( \hat{W}_{2,1} \hat{\mathbb{E}}[e_{o_1} e_{o_1}^\top] \hat{W}_{2,1}^\top \right)^{-1} \\ &= \left( \hat{P}_{2:3,1} \hat{P}_{1,1}^{-1} \hat{P}_{2,1}^\top \right) \left( \hat{P}_{2,1} \hat{P}_{1,1}^{-1} \hat{P}_{2,1}^\top \right)^{-1} \\ &= \hat{P}_{2:3,1} \left( \hat{P}_{2,1} \right)^{-1} \end{aligned} \quad (\text{A.3})$$

Having learned the matrix  $\hat{W}$ , we can estimate

$$\hat{P}_t \equiv \hat{W} q_t$$

starting from a state  $q_t$ . Since  $p_t$  specifies a joint distribution over  $e_{o_{t+1}}$  and  $e_{o_t}$  we can easily condition on (or marginalize  $o_t$ ) to obtain  $q_{t+1}$ . We will show that this is equivalent to learning and applying observable operators as in [1]:

For a given value  $x$  of  $o_2$ , define

$$B_x = u_x^\top \hat{W} = u_x^\top \hat{P}_{2:3,1} \left( \hat{P}_{2,1} \right)^{-1}, \quad (\text{A.4})$$

where  $u_x$  is an  $|\mathcal{O}| \times |\mathcal{O}|^2$  matrix which selects a block of rows in  $\hat{P}_{2:3,1}$  corresponding to  $o_2 = x$ . Specifically,  $u_x = \delta_x \otimes_k I_{|\mathcal{O}|}$ .<sup>1</sup>

$$\begin{aligned} q_{t+1} &= \hat{\mathbb{E}}[e_{o_{t+1}} | o_{1:t}] \propto u_{o_t}^\top \hat{\mathbb{E}}[e_{o_{t+1}} | o_{1:t-1}] \\ &= u_{o_t}^\top \hat{\mathbb{E}}[\xi_t | o_{1:t-1}] = u_{o_t}^\top \hat{W} \mathbb{E}[\psi_t | o_{1:t-1}] = B_{o_t} q_t \end{aligned}$$

with a normalization constant given by

$$\frac{1}{1^\top B_{o_t} q_t} \quad (\text{A.5})$$

Now we move to a more realistic setting, where we have  $\text{rank}(P_{2,1}) = m < |\mathcal{O}|$ . Therefore we project the predictive state using a matrix  $U$  that preserves the dynamics, by requiring that  $U^\top O$  (i.e.  $U$  is an independent set of columns spanning the range of the HMM observation matrix  $O$ ).

It can be shown [1] that  $\mathcal{R}(O) = \mathcal{R}(P_{2,1}) = \mathcal{R}(P_{2,1} P_{1,1}^{-1})$ . Therefore, we can use the leading  $m$  left singular vectors of  $\hat{W}_{2,1}$ , which corresponds to replacing the linear regression in S1A with a reduced rank regression. However, for the sake of our discussion we will use the singular vectors of  $P_{2,1}$ . In more detail, let  $[U, S, V]$  be the rank- $m$  SVD decomposition of  $P_{2,1}$ . We use  $\psi_t = U^\top e_{o_t}$  and  $\xi_t = e_{o_t} \otimes_k U^\top e_{o_{t+1}}$ . S1 weights are then given by  $\hat{W}_{2,1}^{rr} = U^\top \hat{W}_{2,1}$  and  $\hat{W}_{2:3,1}^{rr} = (I_{|\mathcal{O}|} \otimes_k U^\top) \hat{W}_{2:3,1}$  and S2 weights are given by

$$\begin{aligned} \hat{W}^{rr} &= (I_{|\mathcal{O}|} \otimes_k U^\top) \hat{W}_{2:3,1} \hat{\mathbb{E}}[e_{o_1} e_{o_1}^\top] \hat{W}_{2,1}^\top U \left( U^\top \hat{W}_{2,1} \hat{\mathbb{E}}[e_{o_1} e_{o_1}^\top] \hat{W}_{2,1}^\top U \right)^{-1} \\ &= (I_{|\mathcal{O}|} \otimes_k U^\top) \hat{P}_{2:3,1} \hat{P}_{1,1}^{-1} V S \left( S V^\top \hat{P}_{1,1}^{-1} V S \right)^{-1} \\ &= (I_{|\mathcal{O}|} \otimes_k U^\top) \hat{P}_{2:3,1} \hat{P}_{1,1}^{-1} V \left( V^\top \hat{P}_{1,1}^{-1} V \right)^{-1} S^{-1} \end{aligned} \quad (\text{A.6})$$

In the limit of infinite data,  $V$  spans  $\text{range}(O) = \text{rowspan}(P_{2:3,1})$  and hence  $P_{2:3,1} = P_{2:3,1} V V^\top$ . Substituting in (A.6) gives

$$W^{rr} = (I_{|\mathcal{O}|} \otimes_k U^\top) P_{2:3,1} V S^{-1} = (I_{|\mathcal{O}|} \otimes_k U^\top) P_{2:3,1} (U^\top P_{2,1})^+$$

Similar to the full-rank case we define, for each observation  $x$  an  $m \times |\mathcal{O}|^2$  selector matrix  $u_x = \delta_x \otimes_k I_m$  and an observation operator

$$B_x = u_x^\top \hat{W}^{rr} \rightarrow U^\top P_{3,x,1} (U^\top P_{2,1})^+ \quad (\text{A.7})$$

This is exactly the observation operator obtained in [1]. However, instead of using A.6, they use A.7 with  $P_{3,x,1}$  and  $P_{2,1}$  replaced by their empirical estimates.

Note that for a state  $b_t = \mathbb{E}[\psi_t | o_{1:t-1}]$ ,  $B_x b_t = P(o_t | o_{1:t-1}) \mathbb{E}[\psi_{t+1} | o_{1:t}] = P(o_t | o_{1:t-1}) b_{t+1}$ . To get  $b_{t+1}$ , the normalization constant becomes  $\frac{1}{P(o_t | o_{1:t-1})} = \frac{1}{b_\infty^\top B_x b_t}$ , where  $b_\infty^\top b = 1$  for any valid predictive state  $b$ . To estimate  $b_\infty$  we solve the aforementioned condition for states estimated from all possible values of history features  $h_t$ . This gives,

$$b_\infty^\top \hat{W}_{2,1}^{rr} I_{|\mathcal{O}|} = b_\infty^\top U^\top \hat{P}_{2,1} \hat{P}_{1,1}^{-1} I_{|\mathcal{O}|} = 1_{|\mathcal{O}|}^\top,$$

where the columns of  $I_{|\mathcal{O}|}$  represent all possible values of  $h_t$ . This in turn gives

$$\begin{aligned} b_\infty^\top &= 1_{|\mathcal{O}|}^\top \hat{P}_{1,1} (U^\top \hat{P}_{2,1})^+ \\ &= \hat{P}_1^\top (U^\top \hat{P}_{2,1})^+, \end{aligned}$$

the same estimator proposed in [1].

---

<sup>1</sup>Following the notation used in [1],  $u_x^\top \hat{P}_{2:3,1} \equiv \hat{P}_{3,x,1}$

## A.2 Stationary Kalman Filter

A Kalman filter is given by

$$\begin{aligned} s_t &= Os_{t-1} + \nu_t \\ o_t &= Ts_t + \epsilon_t \\ \nu_t &\sim \mathcal{N}(0, \Sigma_s) \\ \epsilon_t &\sim \mathcal{N}(0, \Sigma_o) \end{aligned}$$

We consider the case of a *stationary* filter where  $\Sigma_t \equiv \mathbb{E}[s_t s_t^\top]$  is independent of  $t$ . We choose our statistics

$$\begin{aligned} h_t &= o_{t-H:t-1} \\ \psi_t &= o_{t:t+F-1} \\ \xi_t &= o_{t:t+F}, \end{aligned}$$

Where a window of observations is represented by stacking individual observations into a single vector. It can be shown [2, 3] that

$$\mathbb{E}[s_t | h_t] = \Sigma_{s,h} \Sigma_{h,h}^{-1} h_t$$

and it follows that

$$\begin{aligned} \mathbb{E}[\psi_t | h_t] &= \Gamma \Sigma_{s,h} \Sigma_{h,h}^{-1} h_t = W_1 h_t \\ \mathbb{E}[\xi_t | h_t] &= \Gamma_+ \Sigma_{s,h} \Sigma_{h,h}^{-1} h_t = W_2 h_t \end{aligned}$$

where  $\Gamma$  is the extended observation operator

$$\Gamma \equiv \begin{pmatrix} O \\ OT \\ \vdots \\ OT^F \end{pmatrix}, \Gamma_+ \equiv \begin{pmatrix} O \\ OT \\ \vdots \\ OT^{F+1} \end{pmatrix}$$

It follows that  $F$  and  $H$  must be large enough to have  $\text{rank}(W) = n$ . Let  $U \in \mathbb{R}^{mF \times n}$  be the matrix of left singular values of  $W_1$  corresponding to non-zero singular values. Then  $U^\top \Gamma$  is invertible and we can write

$$\begin{aligned} \mathbb{E}[\psi_t | h_t] &= UU^\top \Gamma \Sigma_{s,h} \Sigma_{h,h}^{-1} h_t = W_1 h_t \\ \mathbb{E}[\xi_t | h_t] &= \Gamma_+ \Sigma_{s,h} \Sigma_{h,h}^{-1} h_t = W_2 h_t \\ \mathbb{E}[\xi_t | h_t] &= \Gamma_+ (U^\top \Gamma)^{-1} U^\top \left( UU^\top \Gamma \Sigma_{s,h} \Sigma_{h,h}^{-1} h_t \right) \\ &= W \mathbb{E}[\psi_t | h_t] \end{aligned}$$

which matches the instrumental regression framework. For the steady-state case (constant Kalman gain), one can estimate  $\Sigma_\xi$  given the data and the parameter  $W$  by solving Riccati equation as described in [3].  $\mathbb{E}[\xi_t | o_{1:t-1}]$  and  $\Sigma_\xi$  then specify a joint Gaussian distribution over the next  $F+1$  observations where marginalization and conditioning can be easily performed.

We can also assume a Kalman filter that is not in the steady state (i.e. the Kalman gain is not constant). In this case we need to maintain sufficient statistics for a predictive Gaussian distribution (i.e. mean and covariance). Let  $\text{vec}$  denote the vectorization operation, which stacks the columns of a matrix into a single vector. We can stack  $h_t$  and  $\text{vec}(h_t h_t^\top)$  into a single vector that we refer to as 1st+2nd moments vector. We do the same for future and extended future. We can, in principle, perform linear regression on these 1st+2nd moment vectors but that requires an unnecessarily large number of parameters. Instead, we can learn an S1A regression function of the form

$$\mathbb{E}[\psi_t | h_t] = W_1 h_t \tag{A.8}$$

$$\mathbb{E}[\psi_t \psi_t^\top | h_t] = W_1 h_t h_t^\top W_1 + R \tag{A.9}$$

$$\tag{A.10}$$

Where  $R$  is simply the covariance of the residuals of the 1st moment regression (i.e. covariance of  $r_t = \psi_t - \mathbb{E}[\psi_t | h_t]$ ). This is still a linear model in terms of 1st+2nd moment vectors and hence we can do the same for S1B and S2 regression models. This way, the extended belief vector  $p_t$  (the expectation of 1st+2nd moments of extended future) fully specifies a joint distribution over the next  $F + 1$  observations.

### A.3 HSE-PSR

We define a class of non-parametric two-stage instrumental regression models. By using conditional mean embedding [4] as S1 regression model, we recover a single-action variant of HSE-PSR [5]. Let  $\mathcal{X}, \mathcal{Y}, \mathcal{Z}$  denote three reproducing kernel Hilbert spaces with reproducing kernels  $k_{\mathcal{X}}, k_{\mathcal{Y}}$  and  $k_{\mathcal{Z}}$  respectively. Assume  $\psi_t \in \mathcal{X}$  and that  $\xi_t \in \mathcal{Y}$  is defined as the tuple  $(o_t \otimes o_t, \psi_{t+1} \otimes o_t)$ . Let  $\Psi \in \mathcal{X} \otimes \mathbb{R}^N$ ,  $\Xi \in \mathcal{Y} \otimes \mathbb{R}^N$  and  $\mathbf{H} \in \mathcal{Z} \otimes \mathbb{R}^N$  be operators that represent training data. Specifically,  $\psi_s, \xi_s, h_s$  are the  $s^{th}$  "columns" in  $\Psi$  and  $\Xi$  and  $\mathbf{H}$  respectively. It is possible to implement S1 using a non-parametric regression method that takes the form of a linear smoother. In such case the training data for S2 regression take the form

$$\begin{aligned}\hat{\mathbb{E}}[\psi_t | h_t] &= \sum_{s=1}^N \beta_{s|h_t} \psi_s \\ \hat{\mathbb{E}}[\xi_t | h_t] &= \sum_{s=1}^N \gamma_{s|h_t} \xi_s,\end{aligned}$$

where  $\beta_s$  and  $\gamma_s$  depend on  $h_t$ . This produces the following training operators for S2 regression:

$$\begin{aligned}\tilde{\Psi} &= \Psi \mathbf{B} \\ \tilde{\Xi} &= \Xi \Gamma,\end{aligned}$$

where  $\mathbf{B}_{st} = \beta_{s|h_t}$  and  $\Gamma_{st} = \gamma_{s|h_t}$ . With this data, S2 regression uses a Gram matrix formulation to estimate the operator

$$W = \Xi \Gamma (\mathbf{B}^\top G_{\mathcal{X}, \mathcal{X}} \mathbf{B} + \lambda I_N)^{-1} \mathbf{B}^\top \Psi^* \quad (\text{A.11})$$

Note that we can use an arbitrary method to estimate  $\mathbf{B}$ . Using conditional mean maps, the weight matrix  $\mathbf{B}$  is computed using kernel ridge regression

$$\mathbf{B} = (G_{\mathcal{Z}, \mathcal{Z}} + \lambda I_N)^{-1} G_{\mathcal{Z}, \mathcal{Z}} \quad (\text{A.12})$$

HSE-PSR learning is similar to this setting, with  $\psi_t$  being a conditional expectation operator of test observations given test actions. For this reason, kernel ridge regression is replaced by application of kernel Bayes rule [6].

For each  $t$ , S1 regression will produce a denoised prediction  $\hat{E}[\xi_t | h_t]$  as a linear combination of training feature maps

$$\hat{E}[\xi_t | h_t] = \Xi \alpha_t = \sum_{s=1}^N \alpha_{t,s} \xi_s$$

This corresponds to the covariance operators

$$\begin{aligned}\hat{\Sigma}_{\psi_{t+1} o_t | h_t} &= \sum_{s=1}^N \alpha_{t,s} \psi_{s+1} \otimes o_s = \Psi' \text{diag}(\alpha_t) \mathbf{O}^* \\ \hat{\Sigma}_{o_t o_t | h_t} &= \sum_{s=1}^N \alpha_{t,s} o_s \otimes o_s = \mathbf{O} \text{diag}(\alpha_t) \mathbf{O}^*\end{aligned}$$

Where,  $\Psi'$  is the shifted future training operator satisfying  $\Psi' e_t = \psi_{t+1}$ . Given these two covariance operators, we can use kernel Bayes rule [6] to condition on  $o_t$  which gives

$$q_{t+1} = \hat{E}[\psi_{t+1} | h_t] = \hat{\Sigma}_{\psi_{t+1} o_t | h_t} (\hat{\Sigma}_{o_t o_t | h_t} + \lambda I)^{-1} o_t. \quad (\text{A.13})$$

Replacing  $o_t$  in (A.13) with its conditional expectation  $\sum_{s=1}^N \alpha_s o_s$  corresponds to marginalizing over  $o_t$  (i.e. prediction). A stable Gram matrix formulation for (A.13) is given by [6]

$$\begin{aligned} q_{t+1} &= \Psi' \text{diag}(\alpha_t) G_{\mathcal{O}, \mathcal{O}} ((\text{diag}(\alpha_t) G_{\mathcal{O}, \mathcal{O}})^2 + \lambda N I)^{-1} \\ &\quad \cdot \text{diag}(\alpha_t) \mathbf{O}^* o_{t+1} \\ &= \Psi' \tilde{\alpha}_{t+1}, \end{aligned} \tag{A.14}$$

which is the state update equation in HSE-PSR. Given  $\tilde{\alpha}_{t+1}$  we perform S2 regression to estimate

$$\hat{P}_{t+1} = \hat{\mathbb{E}}[\xi_{t+1} \mid o_{1:t+1}] = \Xi \alpha_{t+1} = W \Psi' \tilde{\alpha}_{t+1},$$

where  $W$  is defined in (A.11).

## B Proofs

### B.1 Proof of Main Theorem

In this section we provide a proof for theorem 2. We provide finite sample analysis of the effects of S1 regression, covariance estimation and regularization. The asymptotic statement becomes a natural consequence.

We will make use of matrix Bernstein's inequality stated below:

**Lemma B.1** (Matrix Bernstein's Inequality [7]). *Let  $A$  be a random square symmetric matrix, and  $r > 0$ ,  $v > 0$  and  $k > 0$  be such that, almost surely,*

$$\begin{aligned} \mathbb{E}[A] &= 0, \quad \lambda_{\max}[A] \leq r, \\ \lambda_{\max}[\mathbb{E}[A^2]] &\leq v, \quad \text{tr}(\mathbb{E}[A^2]) \leq k. \end{aligned}$$

*If  $A_1, A_2, \dots, A_N$  are independent copies of  $A$ , then for any  $t > 0$ ,*

$$\begin{aligned} \Pr \left[ \lambda_{\max} \left[ \frac{1}{N} \sum_{t=1}^N A_t \right] > \sqrt{\frac{2vt}{N}} + \frac{rt}{3N} \right] \\ \leq \frac{kt}{v} (e^t - t - 1)^{-1}. \end{aligned} \tag{B.1}$$

*If  $t \geq 2.6$ , then  $t(e^t - t - 1)^{-1} \leq e^{-t/2}$ .*

Recall that, assuming  $x_{test} \in \mathcal{R}(\Sigma_{\bar{x}\bar{x}})$ , we have three sources of error: first, the error in S1 regression causes the input to S2 regression procedure  $(\hat{x}_t, \hat{y}_t)$  to be a perturbed version of the true  $(\bar{x}_t, \bar{y}_t)$ ; second, the covariance operators are estimated from a finite sample of size  $N$ ; and third, there is the effect of regularization. In the proof, we characterize the effect of each source of error. To do so, we define the following intermediate quantities:

$$W_\lambda = \Sigma_{\bar{y}\bar{x}} (\Sigma_{\bar{x}\bar{x}} + \lambda I)^{-1} \tag{B.2}$$

$$\bar{W}_\lambda = \hat{\Sigma}_{\bar{y}\bar{x}} \left( \hat{\Sigma}_{\bar{x}\bar{x}} + \lambda I \right)^{-1}, \tag{B.3}$$

where

$$\hat{\Sigma}_{\bar{y}\bar{x}} \equiv \frac{1}{N} \sum_{t=1}^N \bar{y}_t \otimes \bar{x}_t$$

and  $\hat{\Sigma}_{\bar{x}\bar{x}}$  is defined similarly. Basically,  $W_\lambda$  captures only the effect of regularization and  $\bar{W}_\lambda$  captures in addition the effect of finite sample estimate of the covariance.  $\bar{W}_\lambda$  is the result of S2 regression if  $\bar{x}$  and  $\bar{y}$  were perfectly recovered by S1 regression. It is important to note that  $\hat{\Sigma}_{\bar{x}\bar{y}}$  and  $\hat{\Sigma}_{\bar{x}\bar{x}}$  are *not* observable quantities since they depend on the true expectations  $\bar{x}$  and  $\bar{y}$ . We will use  $\lambda_{xi}$  and  $\lambda_{yi}$  to denote the  $i^{th}$  eigenvalue of  $\Sigma_{\bar{x}\bar{x}}$  and  $\Sigma_{\bar{y}\bar{y}}$  respectively in descending order and we will use  $\|\cdot\|$  to denote the operator norm.

Before we prove the main theorem, we define the quantities  $\zeta_{\delta, N}^{\bar{x}\bar{x}}$  and  $\zeta_{\delta, N}^{\bar{x}\bar{y}}$  which we use to bound the effect of covariance estimation from finite data, as stated in the following lemma:

**Lemma B.2** (Covariance error bound). *Let  $N$  be a positive integer and  $\delta \in (0, 1)$  and assume that  $\|\bar{x}\|, \|\bar{y}\| < c < \infty$  almost surely. Let  $\zeta_{\delta, N}^{\bar{x}\bar{y}}$  be defined as:*

$$\zeta_{\delta, N}^{\bar{x}\bar{y}} = \sqrt{\frac{2vt}{N}} + \frac{rt}{3N}, \quad (\text{B.4})$$

where

$$\begin{aligned} t &= \max(2.6, 2 \log(4k/\delta v)) \\ r &= c^2 + \|\Sigma_{\bar{y}\bar{x}}\| \\ v &= c^2 \max(\lambda_{y1}, \lambda_{x1}) + \|\Sigma_{\bar{x}\bar{y}}\|^2 \\ k &= c^2 (\text{tr}(\Sigma_{\bar{x}\bar{x}}) + \text{tr}(\Sigma_{\bar{y}\bar{y}})) \end{aligned}$$

In addition, let  $\zeta_{\delta, N}^{\bar{x}\bar{x}}$  be defined as:

$$\zeta_{\delta, N}^{\bar{x}\bar{x}} = \sqrt{\frac{2v't'}{N}} + \frac{r't'}{3N}, \quad (\text{B.5})$$

where

$$\begin{aligned} t' &= \max(2.6, 2 \log(4k'/\delta v')) \\ r' &= c^2 + \lambda_{x1} \\ v' &= c^2 \lambda_{x1} + \lambda_{x1}^2 \\ k' &= c^2 \text{tr}(\Sigma_{\bar{x}\bar{x}}) \end{aligned}$$

and define  $\zeta_{\delta, N}^{\bar{y}\bar{y}}$  similarly for  $\Sigma_{\bar{y}\bar{y}}$ .

It follows that, with probability at least  $1 - \delta/2$ ,

$$\begin{aligned} \|\hat{\Sigma}_{\bar{y}\bar{x}} - \Sigma_{\bar{y}\bar{x}}\| &< \zeta_{\delta, N}^{\bar{x}\bar{y}} \\ \|\hat{\Sigma}_{\bar{x}\bar{x}} - \Sigma_{\bar{x}\bar{x}}\| &< \zeta_{\delta, N}^{\bar{x}\bar{x}} \\ \|\hat{\Sigma}_{\bar{y}\bar{y}} - \Sigma_{\bar{y}\bar{y}}\| &< \zeta_{\delta, N}^{\bar{y}\bar{y}} \end{aligned}$$

*Proof.* We show that each statement holds with probability at least  $1 - \delta/6$ . The claim then follows directly from the union bound. We start with  $\zeta_{\delta, N}^{\bar{x}\bar{x}}$ . By setting  $A_t = \bar{x}_t \otimes \bar{x}_t - \Sigma_{\bar{x}\bar{x}}$  then we would like to obtain a high probability bound on  $\|\frac{1}{N} \sum_{t=1}^N A_t\|$ . Lemma B.1 shows that, in order to satisfy the bound with probability at least  $1 - \delta/6$ , it suffices to set  $t$  to  $\max(2.6, 2k \log(6/\delta v))$ . So, it remains to find suitable values for  $r, v$  and  $k$ :

$$\begin{aligned} \lambda_{\max}[A] &\leq \|\bar{x}\|^2 + \|\Sigma_{\bar{x}\bar{x}}\| \leq c^2 + \lambda_{x1} = r' \\ \lambda_{\max}[\mathbb{E}[A^2]] &= \lambda_{\max}[\mathbb{E}[\|\bar{x}\|^2(\bar{x} \otimes \bar{x}) - (\bar{x} \otimes \bar{x})\Sigma_{\bar{x}\bar{x}} - \Sigma_{\bar{x}\bar{x}}(\bar{x} \otimes \bar{x}) + \Sigma_{\bar{x}\bar{x}}^2]] \\ &= \lambda_{\max}[\mathbb{E}[\|\bar{x}\|^2(\bar{x} \otimes \bar{x}) - \Sigma_{\bar{x}\bar{x}}^2]] \leq c^2 \lambda_{x1} + \lambda_{x1}^2 = v' \\ \text{tr}[\mathbb{E}[A^2]] &= \text{tr}[\mathbb{E}[\|\bar{x}\|^2(\bar{x} \otimes \bar{x}) - \Sigma_{\bar{x}\bar{x}}^2]] \leq \text{tr}[\mathbb{E}[\|\bar{x}\|^2(\bar{x} \otimes \bar{x})]] \leq c^2 \text{tr}(\Sigma_{\bar{x}\bar{x}}) = k' \end{aligned}$$

The case of  $\zeta_{\delta, N}^{\bar{y}\bar{y}}$  can be proven similarly. Now moving to  $\zeta_{\delta, N}^{\bar{x}\bar{y}}$ , we have  $B_t = \bar{y}_t \otimes \bar{x}_t - \Sigma_{\bar{y}\bar{x}}$ . Since  $B_t$  is not square, we use the Hermitian dilation  $\mathcal{H}(B)$  defined as follows[8]:

$$A = \mathcal{H}(B) = \begin{bmatrix} 0 & B \\ B^* & 0 \end{bmatrix}$$

Note that

$$\lambda_{\max}[A] = \|B\|, \quad A^2 = \begin{bmatrix} BB^* & 0 \\ 0 & B^*B \end{bmatrix}$$

therefore suffices to bound  $\|\frac{1}{N} \sum_{t=1}^N A_t\|$  using an argument similar to that used in  $\zeta_{\delta, N}^{\bar{x}\bar{x}}$  case.  $\square$

To prove theorem 2, we write

$$\begin{aligned}\|\hat{W}_\lambda x_{\text{test}} - W x_{\text{test}}\|_{\mathcal{Y}} &\leq \|(\hat{W}_\lambda - \bar{W}_\lambda) \bar{x}_{\text{test}}\|_{\mathcal{Y}} \\ &\quad + \|(\bar{W}_\lambda - W_\lambda) \bar{x}_{\text{test}}\|_{\mathcal{Y}} \\ &\quad + \|(W_\lambda - W) \bar{x}_{\text{test}}\|_{\mathcal{Y}}\end{aligned}\tag{B.6}$$

We will now present bounds on each term. We consider the case where  $\bar{x}_{\text{test}} \in \mathcal{R}(\Sigma_{\bar{x}\bar{x}})$ . Extension to  $\overline{\mathcal{R}(\Sigma_{\bar{x}\bar{x}})}$  is a result of the assumed boundedness of  $W$ , which implies the boundedness of  $\hat{W}_\lambda - W$ .

**Lemma B.3** (Error due to S1 Regression). *Assume that  $\|\bar{x}\|, \|\bar{y}\| < c < \infty$  almost surely, and let  $\eta_{\delta,N}$  be as defined in Definition 1. The following holds with probability at least  $1 - \delta$*

$$\begin{aligned}\|\hat{W}_\lambda - \bar{W}_\lambda\| &\leq \sqrt{\lambda_{y1} + \zeta_{\delta,N}^{\bar{y}\bar{y}}} \frac{(2c\eta_{\delta,N} + \eta_{\delta,N}^2)}{\lambda^{\frac{3}{2}}} \\ &\quad + \frac{(2c\eta_{\delta,N} + \eta_{\delta,N}^2)}{\lambda} \\ &= O\left(\eta_{\delta,N} \left(\frac{1}{\lambda} + \frac{\sqrt{1 + \frac{\log(1/\delta)}{\sqrt{N}}}}{\lambda^{\frac{3}{2}}}\right)\right).\end{aligned}$$

The asymptotic statement assumes  $\eta_{\delta,N} \rightarrow 0$  as  $N \rightarrow \infty$ .

*Proof.* Write  $\hat{\Sigma}_{\hat{x}\hat{x}} = \hat{\Sigma}_{\bar{x}\bar{x}} + \Delta_x$  and  $\hat{\Sigma}_{\hat{y}\hat{x}} = \hat{\Sigma}_{\bar{y}\bar{x}} + \Delta_{yx}$ . We know that, with probability at least  $1 - \delta/2$ , the following is satisfied for all unit vectors  $\phi_x \in \mathcal{X}$  and  $\phi_y \in \mathcal{Y}$

$$\begin{aligned}\langle \phi_y, \Delta_{yx} \phi_x \rangle_{\mathcal{Y}} &= \frac{1}{N} \sum_{t=1}^N \langle \phi_y, \hat{y}_t \rangle_{\mathcal{Y}} \langle \phi_x, \hat{x}_t \rangle_{\mathcal{X}} \\ &\quad - \langle \phi_y, \hat{y}_t \rangle_{\mathcal{Y}} \langle \phi_x, \bar{x}_t \rangle_{\mathcal{X}} \\ &\quad + \langle \phi_y, \hat{y}_t \rangle_{\mathcal{Y}} \langle \phi_x, \bar{x}_t \rangle_{\mathcal{X}} - \langle \phi_y, \bar{y}_t \rangle_{\mathcal{Y}} \langle \phi_x, \bar{x}_t \rangle_{\mathcal{X}} \\ &= \frac{1}{N} \sum_t \langle \phi_y, \bar{y}_t + (\hat{y}_t - \bar{y}_t) \rangle_{\mathcal{Y}} \langle \phi_x, \hat{x}_t - \bar{x}_t \rangle_{\mathcal{X}} \\ &\quad + \langle \phi_y, \hat{y}_t - \bar{y}_t \rangle_{\mathcal{Y}} \langle \phi_x, \bar{x}_t \rangle_{\mathcal{X}} \\ &\leq 2c\eta_{\delta,N} + \eta_{\delta,N}^2\end{aligned}$$

Therefore,

$$\|\Delta_{yx}\| = \sup_{\|\phi_x\|_{\mathcal{X}} \leq 1, \|\phi_y\|_{\mathcal{Y}} \leq 1} \langle \phi_y, \Delta_{yx} \phi_x \rangle_{\mathcal{Y}} \leq 2c\eta_{\delta,N} + \eta_{\delta,N}^2,$$

and similarly

$$\|\Delta_x\| \leq 2c\eta_{\delta,N} + \eta_{\delta,N}^2,$$

with probability  $1 - \delta/2$ . We can write

$$\begin{aligned}\hat{W}_\lambda - \bar{W}_\lambda &= \hat{\Sigma}_{\bar{y}\bar{x}} \left( (\hat{\Sigma}_{\bar{x}\bar{x}} + \Delta_x + \lambda I)^{-1} - (\hat{\Sigma}_{\bar{x}\bar{x}} + \lambda I)^{-1} \right) \\ &\quad + \Delta_{yx} (\hat{\Sigma}_{\bar{x}\bar{x}} + \Delta_x + \lambda I)^{-1}\end{aligned}$$

Using the fact that  $B^{-1} - A^{-1} = B^{-1}(A - B)A^{-1}$  for invertible operators  $A$  and  $B$  we get

$$\begin{aligned}\hat{W}_\lambda - \bar{W}_\lambda &= -\hat{\Sigma}_{\bar{y}\bar{x}} (\hat{\Sigma}_{\bar{x}\bar{x}} + \lambda I)^{-1} \Delta_x (\hat{\Sigma}_{\bar{x}\bar{x}} + \Delta_x + \lambda I)^{-1} \\ &\quad + \Delta_{yx} (\hat{\Sigma}_{\bar{x}\bar{x}} + \Delta_x + \lambda I)^{-1}\end{aligned}$$

we then use the decomposition  $\hat{\Sigma}_{\bar{y}\bar{x}} = \hat{\Sigma}_{\bar{y}\bar{y}}^{\frac{1}{2}} V \hat{\Sigma}_{\bar{x}\bar{x}}^{\frac{1}{2}}$ , where  $V$  is a correlation operator satisfying  $\|V\| \leq 1$ . This gives

$$\begin{aligned}\hat{W}_\lambda - \bar{W}_\lambda &= \\ &\quad - \hat{\Sigma}_{\bar{y}\bar{y}}^{\frac{1}{2}} V \hat{\Sigma}_{\bar{x}\bar{x}}^{\frac{1}{2}} (\hat{\Sigma}_{\bar{x}\bar{x}} + \lambda I)^{-\frac{1}{2}} (\hat{\Sigma}_{\bar{x}\bar{x}} + \lambda I)^{-\frac{1}{2}} \Delta_x (\hat{\Sigma}_{\bar{x}\bar{x}} + \Delta_x + \lambda I)^{-1} \\ &\quad + \Delta_{yx} (\hat{\Sigma}_{\bar{x}\bar{x}} + \Delta_x + \lambda I)^{-1}\end{aligned}$$

Noting that  $\|\hat{\Sigma}_{\bar{x}\bar{x}}^{\frac{1}{2}}(\hat{\Sigma}_{\bar{x}\bar{x}} + \lambda I)^{-\frac{1}{2}}\| \leq 1$ , the rest of the proof follows from triangular inequality and the fact that  $\|AB\| \leq \|A\|\|B\|$   $\square$

**Lemma B.4** (Error due to Covariance). *Assuming that  $\|\bar{x}\|_{\mathcal{X}}, \|\bar{y}\|_{\mathcal{Y}} < c < \infty$  almost surely, the following holds with probability at least  $1 - \frac{\delta}{2}$*

$$\|\bar{W}_{\lambda} - W_{\lambda}\| \leq \sqrt{\lambda_{y1}} \zeta_{\delta,N}^{\bar{x}\bar{x}} \lambda^{-\frac{3}{2}} + \frac{\zeta_{\delta,N}^{\bar{x}\bar{y}}}{\lambda}$$

, where  $\zeta_{\delta,N}^{\bar{x}\bar{x}}$  and  $\zeta_{\delta,N}^{\bar{x}\bar{y}}$  are as defined in Lemma B.2.

*Proof.* Write  $\hat{\Sigma}_{\bar{x}\bar{x}} = \Sigma_{\bar{x}\bar{x}} + \Delta_x$  and  $\hat{\Sigma}_{\bar{y}\bar{x}} = \Sigma_{\bar{y}\bar{x}} + \Delta_{yx}$ . Then we get

$$\bar{W}_{\lambda} - W_{\lambda} = \Sigma_{\bar{y}\bar{x}} \left( (\Sigma_{\bar{x}\bar{x}} + \Delta_x + \lambda I)^{-1} - (\Sigma_{\bar{x}\bar{x}} + \lambda I)^{-1} \right) + \Delta_{yx} (\Sigma_{\bar{x}\bar{x}} + \Delta_x + \lambda I)^{-1}$$

Using the fact that  $B^{-1} - A^{-1} = B^{-1}(A - B)A^{-1}$  for invertible operators  $A$  and  $B$  we get

$$\bar{W}_{\lambda} - W_{\lambda} = -\Sigma_{\bar{y}\bar{x}} (\Sigma_{\bar{x}\bar{x}} + \lambda I)^{-1} \Delta_x (\Sigma_{\bar{x}\bar{x}} + \Delta_x + \lambda I)^{-1} + \Delta_{yx} (\Sigma_{\bar{x}\bar{x}} + \Delta_x + \lambda I)^{-1}$$

we then use the decomposition  $\Sigma_{\bar{y}\bar{x}} = \Sigma_{\bar{y}\bar{y}}^{\frac{1}{2}} V \Sigma_{\bar{x}\bar{x}}^{\frac{1}{2}}$ , where  $V$  is a correlation operator satisfying  $\|V\| \leq 1$ . This gives

$$\begin{aligned} \bar{W}_{\lambda} - W_{\lambda} &= \\ &= -\Sigma_{\bar{y}\bar{y}}^{\frac{1}{2}} V \Sigma_{\bar{x}\bar{x}}^{\frac{1}{2}} (\Sigma_{\bar{x}\bar{x}} + \lambda I)^{-\frac{1}{2}} (\Sigma_{\bar{x}\bar{x}} + \Delta_x + \lambda I)^{-\frac{1}{2}} \\ &\quad \cdot \Delta_x (\Sigma_{\bar{x}\bar{x}} + \Delta_x + \lambda I)^{-1} \\ &\quad + \Delta_{yx} (\Sigma_{\bar{x}\bar{x}} + \Delta_x + \lambda I)^{-1} \end{aligned}$$

Noting that  $\|\Sigma_{\bar{x}\bar{x}}^{\frac{1}{2}} (\Sigma_{\bar{x}\bar{x}} + \lambda I)^{-\frac{1}{2}}\| \leq 1$ , the rest of the proof follows from triangular inequality and the fact that  $\|AB\| \leq \|A\|\|B\|$   $\square$

**Lemma B.5** (Error due to Regularization on inputs within  $\mathcal{R}(\Sigma_{\bar{x}\bar{x}})$ ). *For any  $x \in \mathcal{R}(\Sigma_{\bar{x}\bar{x}})$  s.t.  $\|x\|_{\mathcal{X}} \leq 1$  and  $\|\Sigma_{\bar{x}\bar{x}}^{-\frac{1}{2}} x\|_{\mathcal{X}} \leq C$ . The following holds*

$$\|(W_{\lambda} - W)x\|_{\mathcal{Y}} \leq \frac{1}{2} \sqrt{\lambda} \|W\|_{HS} C$$

*Proof.* Since  $x \in \mathcal{R}(\Sigma_{\bar{x}\bar{x}}) \subseteq \mathcal{R}(\Sigma_{\bar{x}\bar{x}}^{\frac{1}{2}})$ , we can write  $x = \Sigma_{\bar{x}\bar{x}}^{\frac{1}{2}} v$  for some  $v \in \mathcal{X}$  s.t.  $\|v\|_{\mathcal{X}} \leq C$ . Then

$$(W_{\lambda} - W)x = \Sigma_{\bar{y}\bar{x}} ((\Sigma_{\bar{x}\bar{x}} + \lambda I)^{-1} - \Sigma_{\bar{x}\bar{x}}^{-1}) \Sigma_{\bar{x}\bar{x}}^{\frac{1}{2}} v$$

Let  $D = \Sigma_{\bar{y}\bar{x}} ((\Sigma_{\bar{x}\bar{x}} + \lambda I)^{-1} - \Sigma_{\bar{x}\bar{x}}^{-1}) \Sigma_{\bar{x}\bar{x}}^{\frac{1}{2}}$ . We will bound the Hilbert-Schmidt norm of  $D$ . Let  $\psi_{xi} \in \mathcal{X}$ ,  $\psi_{yi} \in \mathcal{Y}$  denote the eigenvector corresponding to  $\lambda_{xi}$  and  $\lambda_{yi}$  respectively. Define  $s_{ij} = |\langle \psi_{yj}, \Sigma_{\bar{x}\bar{y}} \psi_{xi} \rangle_{\mathcal{Y}}|$ . Then we have

$$\begin{aligned} |\langle \psi_{yj}, D\psi_{xi} \rangle_{\mathcal{Y}}| &= \left| \langle \psi_{yj}, \Sigma_{\bar{y}\bar{x}} \frac{\lambda}{(\lambda_{xi} + \lambda) \sqrt{\lambda_{xi}}} \psi_{xi} \rangle_{\mathcal{Y}} \right| \\ &= \frac{\lambda s_{ij}}{(\lambda_{xi} + \lambda) \sqrt{\lambda_{xi}}} = \frac{s_{ij}}{\sqrt{\lambda_{xi}}} \frac{1}{\frac{1}{\lambda_{xi}} + 1} \\ &\leq \frac{s_{ij}}{\sqrt{\lambda_{xi}}} \cdot \frac{1}{2} \sqrt{\frac{\lambda}{\lambda_{xi}}} = \frac{1}{2} \sqrt{\lambda} \frac{s_{ij}}{\lambda_{xi}} \\ &= \frac{1}{2} \sqrt{\lambda} |\langle \psi_{yj}, W\psi_{xi} \rangle_{\mathcal{Y}}|, \end{aligned}$$

where the inequality follows from the arithmetic-geometric-harmonic mean inequality. This gives the following bound

$$\|D\|_{HS}^2 = \sum_{i,j} \langle \psi_{yj}, D\psi_{xi} \rangle_{\mathcal{Y}}^2 \leq \frac{1}{2} \sqrt{\lambda} \|W\|_{HS}^2$$

and hence

$$\begin{aligned} \|(W_\lambda - W)x\|_{\mathcal{Y}} &\leq \|D\| \|v\|_{\mathcal{X}} \leq \|D\|_{HS} \|v\|_{\mathcal{X}} \\ &\leq \frac{1}{2} \sqrt{\lambda} \|W\|_{HS} C \end{aligned}$$

□

Note that the additional assumption that  $\|\Sigma_{\bar{x}\bar{x}}^{-\frac{1}{2}}x\|_{\mathcal{X}} \leq C$  is not required to obtain an asymptotic  $O(\sqrt{\lambda})$  rate for a given  $x$ . This assumption, however, allows us to uniformly bound the constant. Theorem 2 is simply the result of plugging the bounds in Lemmata B.3, B.4, and B.5 into (B.6) and using the union bound.

## B.2 Proof of Lemma 3

for  $t = 1$ : Let  $\mathcal{I}$  be an index set over training instances such that

$$\hat{q}_1^{\text{test}} = \frac{1}{|\mathcal{I}|} \sum_{i \in \mathcal{I}} \hat{q}_i$$

Then

$$\|\hat{q}_1^{\text{test}} - \tilde{q}_1^{\text{test}}\|_{\mathcal{X}} = \frac{1}{|\mathcal{I}|} \sum_{i \in \mathcal{I}} \|\hat{q}_i - \tilde{q}_i\|_{\mathcal{X}} \leq \frac{1}{|\mathcal{I}|} \sum_{i \in \mathcal{I}} \|\hat{q}_i - q_i\|_{\mathcal{X}} \leq \eta_{\delta, N}$$

for  $t > 1$ : Let  $A$  denote a projection operator on  $\mathcal{R}^\perp(\Sigma_{\bar{y}\bar{y}})$

$$\begin{aligned} \|\hat{q}_{t+1}^{\text{test}} - \tilde{q}_{t+1}^{\text{test}}\|_{\mathcal{X}} &\leq L \|\hat{p}_t^{\text{test}} - \tilde{p}_t^{\text{test}}\|_{\mathcal{Y}} \leq L \|A\hat{W}_\lambda \hat{q}_t^{\text{test}}\|_{\mathcal{Y}} \\ &\leq L \left\| \frac{1}{N} \left( \sum_{i=1}^N A\hat{p}_i \otimes \hat{q}_i \right) \left( \frac{1}{N} \sum_{i=1}^N \hat{q}_i \otimes \hat{q}_i + \lambda I \right)^{-1} \right\| \|\hat{q}_t^{\text{test}}\|_{\mathcal{X}} \\ &\leq L \left\| \frac{1}{N} \sum_{i=1}^N A\hat{p}_i \otimes A\hat{p}_i \right\|^{\frac{1}{2}} \frac{1}{\sqrt{\lambda}} \|\hat{q}_t^{\text{test}}\|_{\mathcal{X}} \leq L \frac{\eta_{\delta, N}}{\sqrt{\lambda}} \|\hat{q}_t^{\text{test}}\|_{\mathcal{X}}, \end{aligned}$$

where the second to last inequality follows from the decomposition similar to  $\Sigma_{YX} = \Sigma_Y^{\frac{1}{2}} V \Sigma_X^{\frac{1}{2}}$ , and the last inequality follows from the fact that  $\|A\hat{p}_i\|_{\mathcal{Y}} \leq \|\hat{p}_i - \bar{p}_i\|_{\mathcal{Y}}$ . □

## C Examples of S1 Regression Bounds

The following propositions provide concrete examples of S1 regression bounds  $\eta_{\delta, N}$  for practical regression models.

**Proposition C.1.** Assume  $\mathcal{X} \equiv \mathbb{R}^{d_x}, \mathbb{R}^{d_y}, \mathbb{R}^{d_z}$  for some  $d_x, d_y, d_z < \infty$  and that  $\bar{x}$  and  $\bar{y}$  are linear vector functions of  $z$  where the parameters are estimated using ordinary least squares. Assume that  $\|\bar{x}\|_{\mathcal{X}}, \|\bar{y}\|_{\mathcal{Y}} < c < \infty$  almost surely. Let  $\eta_{\delta, N}$  be as defined in Definition 1. Then

$$\eta_{\delta, N} = O \left( \sqrt{\frac{d_z}{N}} \log((d_x + d_y)/\delta) \right)$$

*Proof.* (sketch) This is based on results that bound parameter estimation error in linear regression with univariate response (e.g. [9]). Note that if  $\tilde{x}_{ti} = U_i^\top z_t$  for some  $U_i \in \mathcal{Z}$ , then a bound on the error norm  $\|\hat{U}_i - U_i\|$  implies a uniform bound of the same rate on  $\hat{x}_i - \tilde{x}$ . The probability of exceeding the bound is scaled by  $1/(d_x + d_y)$  to correct for multiple regressions.  $\square$

Variants of Proposition C.1 can also be developed using bounds on non-linear regression models (e.g., generalized linear models).

The next proposition addresses a scenario where  $\mathcal{X}$  and  $\mathcal{Y}$  are infinite dimensional.

**Proposition C.2.** *Assume that  $x$  and  $y$  are kernel evaluation functionals,  $\bar{x}$  and  $\bar{y}$  are linear vector functions of  $z$  where the linear operator is estimated using conditional mean embedding [4] with regularization parameter  $\lambda_0 > 0$  and that  $\|\bar{x}\|_{\mathcal{X}}, \|\bar{y}\|_{\mathcal{Y}} < c < \infty$  almost surely. Let  $\eta_{\delta,N}$  be as defined in Definition 1. It follows that*

$$\eta_{\delta,N} = O \left( \sqrt{\lambda_0} + \sqrt{\frac{\log(N/\delta)}{\lambda_0 N}} \right)$$

*Proof.* (sketch) This bound is based on [4], which gives a bound on the error in estimating the conditional mean embedding. The error probability is adjusted by  $\delta/4N$  to accommodate the requirement that the bound holds for all training data.  $\square$

## References

- [1] Daniel Hsu, Sham M. Kakade, and Tong Zhang. A spectral algorithm for learning hidden markov models. In *COLT*, 2009.
- [2] Byron Boots. *Spectral Approaches to Learning Predictive Representations*. PhD thesis, Carnegie Mellon University, December 2012.
- [3] P. van Overschee and L.R. de Moor. *Subspace identification for linear systems: theory, implementation, applications*. Kluwer Academic Publishers, 1996.
- [4] Le Song, Jonathan Huang, Alexander J. Smola, and Kenji Fukumizu. Hilbert space embeddings of conditional distributions with applications to dynamical systems. In *Proceedings of the 26th Annual International Conference on Machine Learning, ICML 2009, Montreal, Quebec, Canada, June 14-18, 2009*, pages 961–968, 2009.
- [5] Byron Boots, Arthur Gretton, and Geoffrey J. Gordon. Hilbert Space Embeddings of Predictive State Representations. In *Proc. 29th Intl. Conf. on Uncertainty in Artificial Intelligence (UAI)*, 2013.
- [6] Kenji Fukumizu, Le Song, and Arthur Gretton. Kernel bayes’ rule: Bayesian inference with positive definite kernels. *Journal of Machine Learning Research*, 14(1):3753–3783, 2013.
- [7] Daniel Hsu, Sham M Kakade, and Tong Zhang. Tail inequalities for sums of random matrices that depend on the intrinsic dimension. *Electronic Communications in Probability*, 17(14):1–13, 2012.
- [8] Joel A. Tropp. User-friendly tools for random matrices: An introduction. NIPS Tutorial, 2012.
- [9] Daniel Hsu, Sham M. Kakade, and Tong Zhang. Random design analysis of ridge regression. In *COLT 2012 - The 25th Annual Conference on Learning Theory, June 25-27, 2012, Edinburgh, Scotland*, pages 9.1–9.24, 2012.
